# Supplementary material
Source: PubMed Central journal article supplement (PMC3499328)

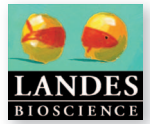

## **Supplemental Material to:**

**Ágnes Lendvai, Frank Johannes, Christina Grimm,  
Jasper J.H. Eijsink, René Wardenaar, Haukeline H. Volders,  
Harry G. Klip, Harry Hollema, Ritsert C. Jansen,  
Ed Schuuring, G. Bea A. Wisman and Ate G.J. van der Zee**

**Genome-wide methylation profiling identifies  
hypermethylated biomarkers in high-grade cervical  
intraepithelial neoplasia**

**Epigenetics 2012; 7(11)**

**<http://dx.doi.org/10.4161/epi.22301>**

**<http://www.landesbioscience.com/journals/epigenetics/article/22301>**

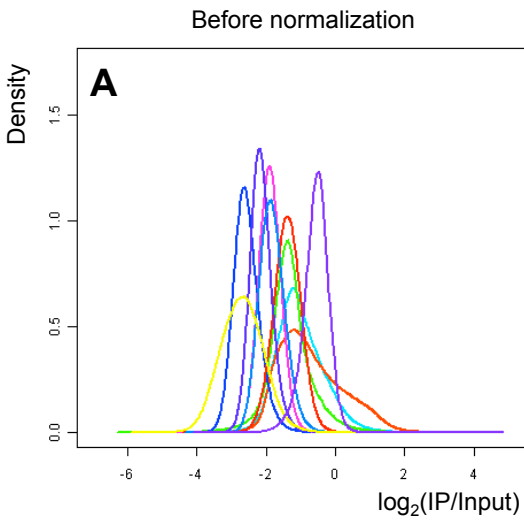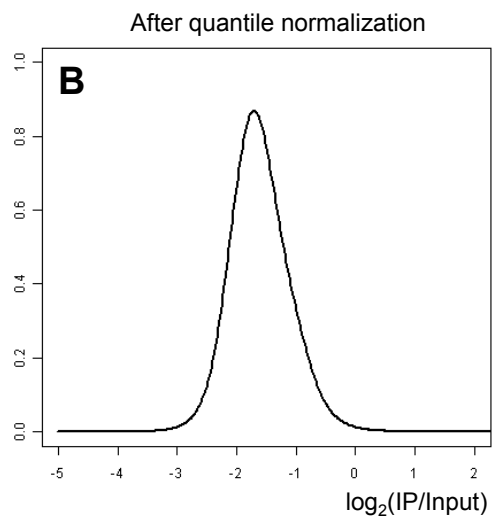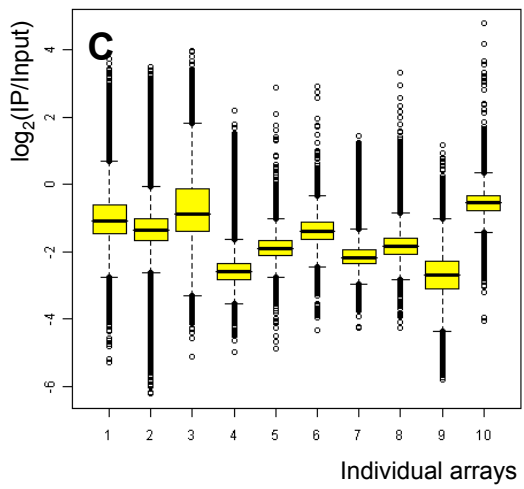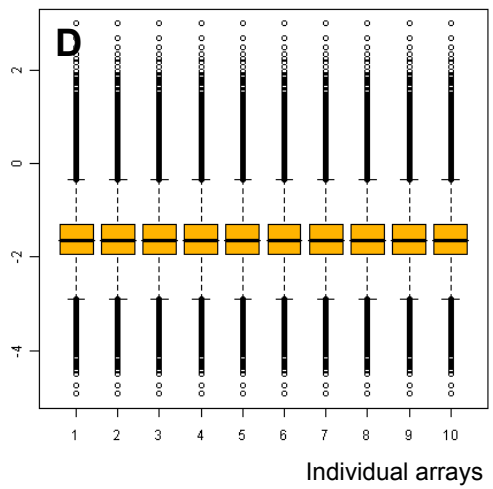

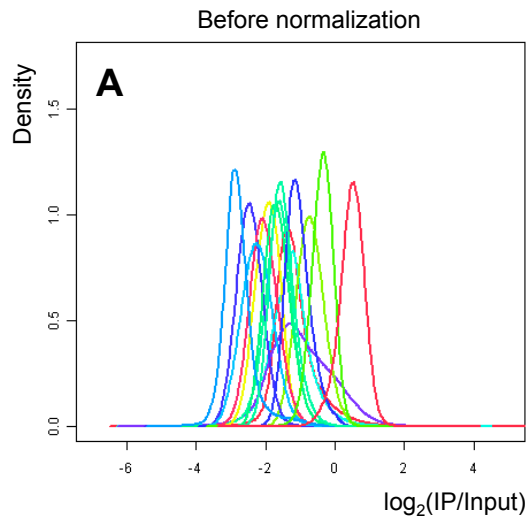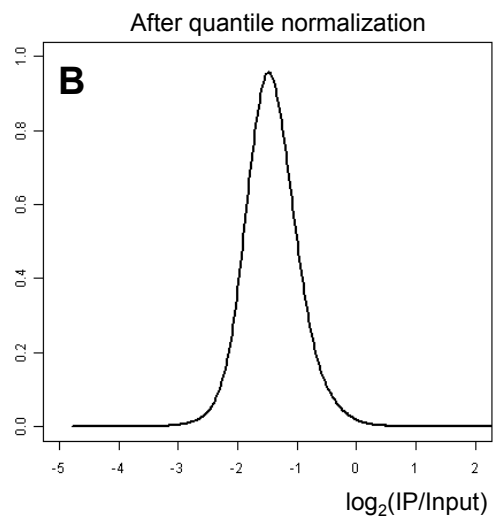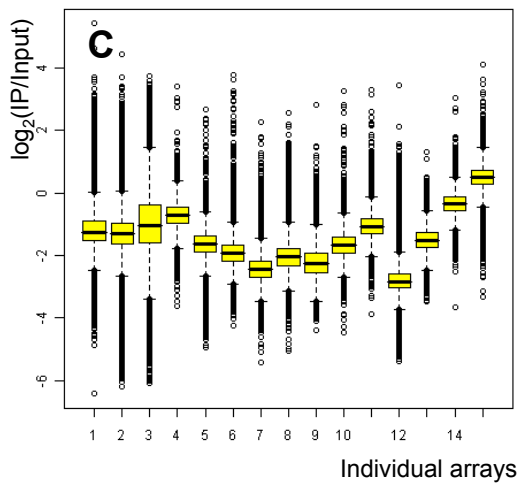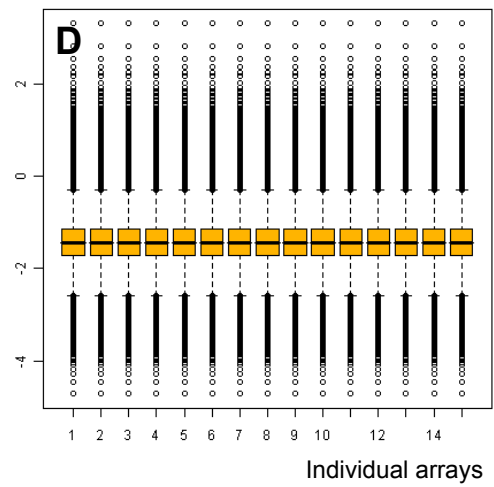

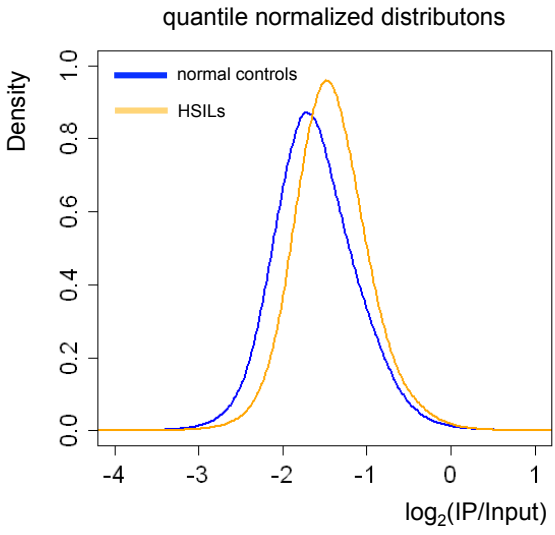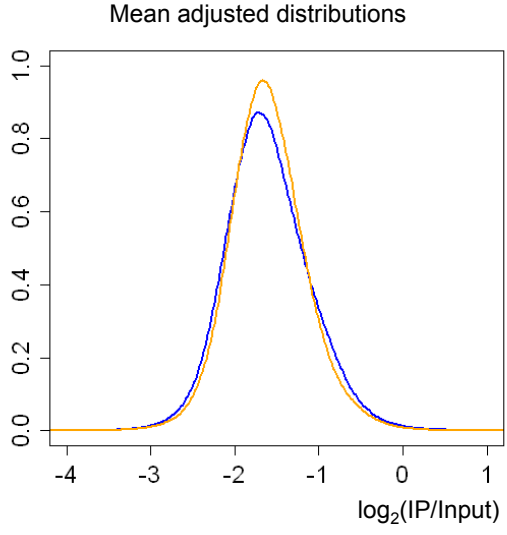

Supplement: epi-7-1268-s01.pdf [file epi-7-1268-s01.pdf]
